# Supplementary material for: Prenatal exposure to ambient air pollutants and early infant growth and adiposity in the Southern California Mother’s Milk Study
Source: PubMed Central journal article supplement (PMC8180163; doi:10.1186/s12940-021-00753-8), 2021-06-05

**Supplemental Figure 1. Flowchart Detailing Participants Retained for the Present Analysis**

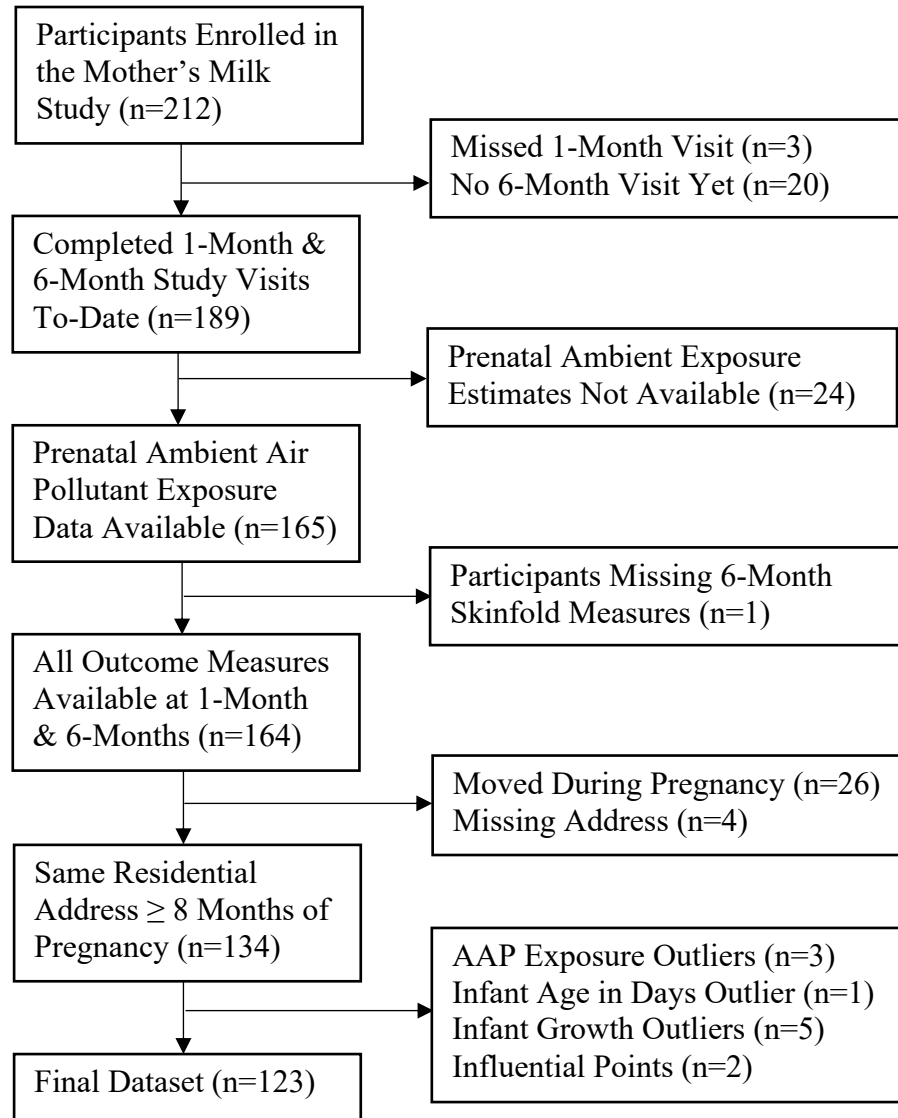

Supplement: 12940_2021_753_MOESM5_ESM.pdf [file 12940_2021_753_MOESM5_ESM.pdf]
