# Supplementary material for: Prenatal exposure to ambient air pollutants and early infant growth and adiposity in the Southern California Mother’s Milk Study
Source: PubMed Central journal article supplement (PMC8180163; doi:10.1186/s12940-021-00753-8), 2021-06-05

**Supplemental Figure 2. Sensitivity Analysis: Multivariable Linear Models Additionally Adjusted for Birth Weight and Baseline of Change Variables**

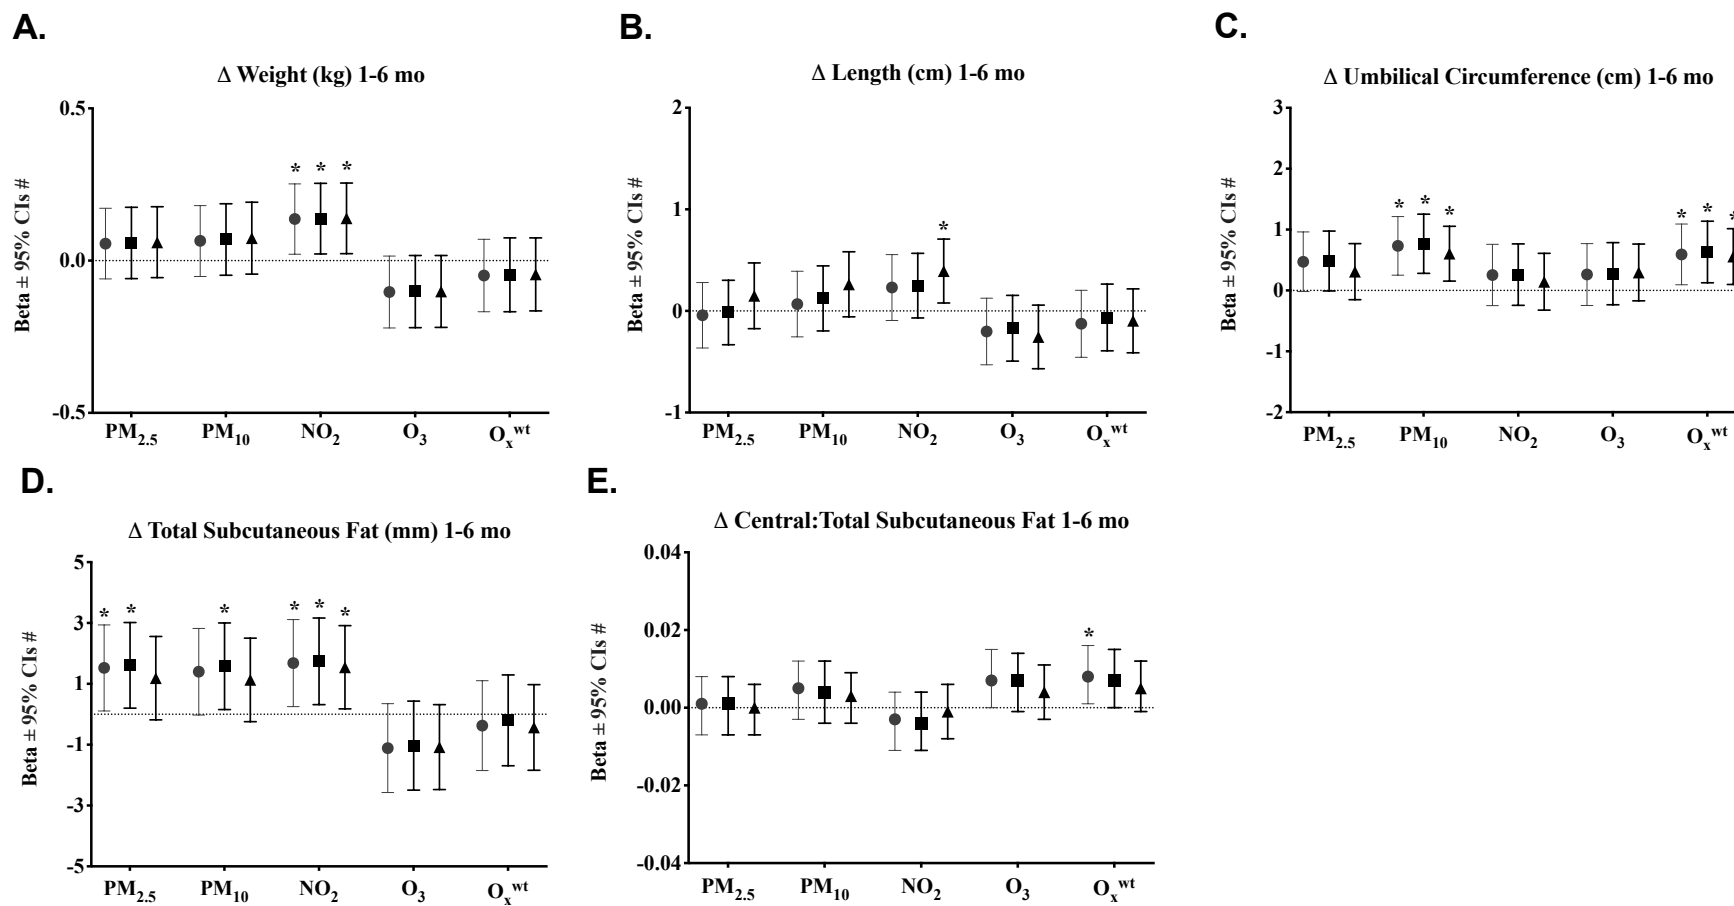

Supplement: 12940_2021_753_MOESM6_ESM.pdf [file 12940_2021_753_MOESM6_ESM.pdf]
